# Supplementary material
Source: PubMed Central journal article supplement (PMC5975107)
Supplement: NIHMS950998-supplement-1.pdf [file NIHMS950998-supplement-1.pdf]

# Supplementary figure 1

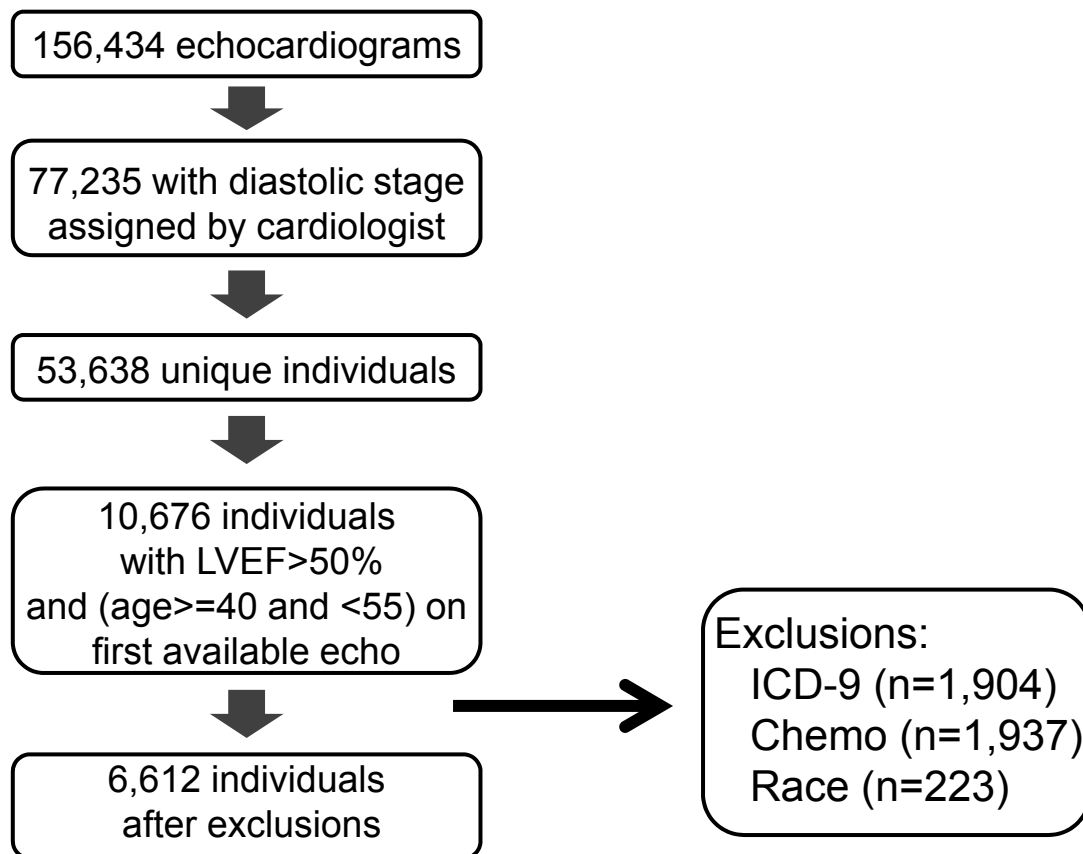

**Supplementary Figure 1: Summary of the selection of the patient population.**  
LVEF=left ventricular ejection fraction.

# Supplementary figure 2

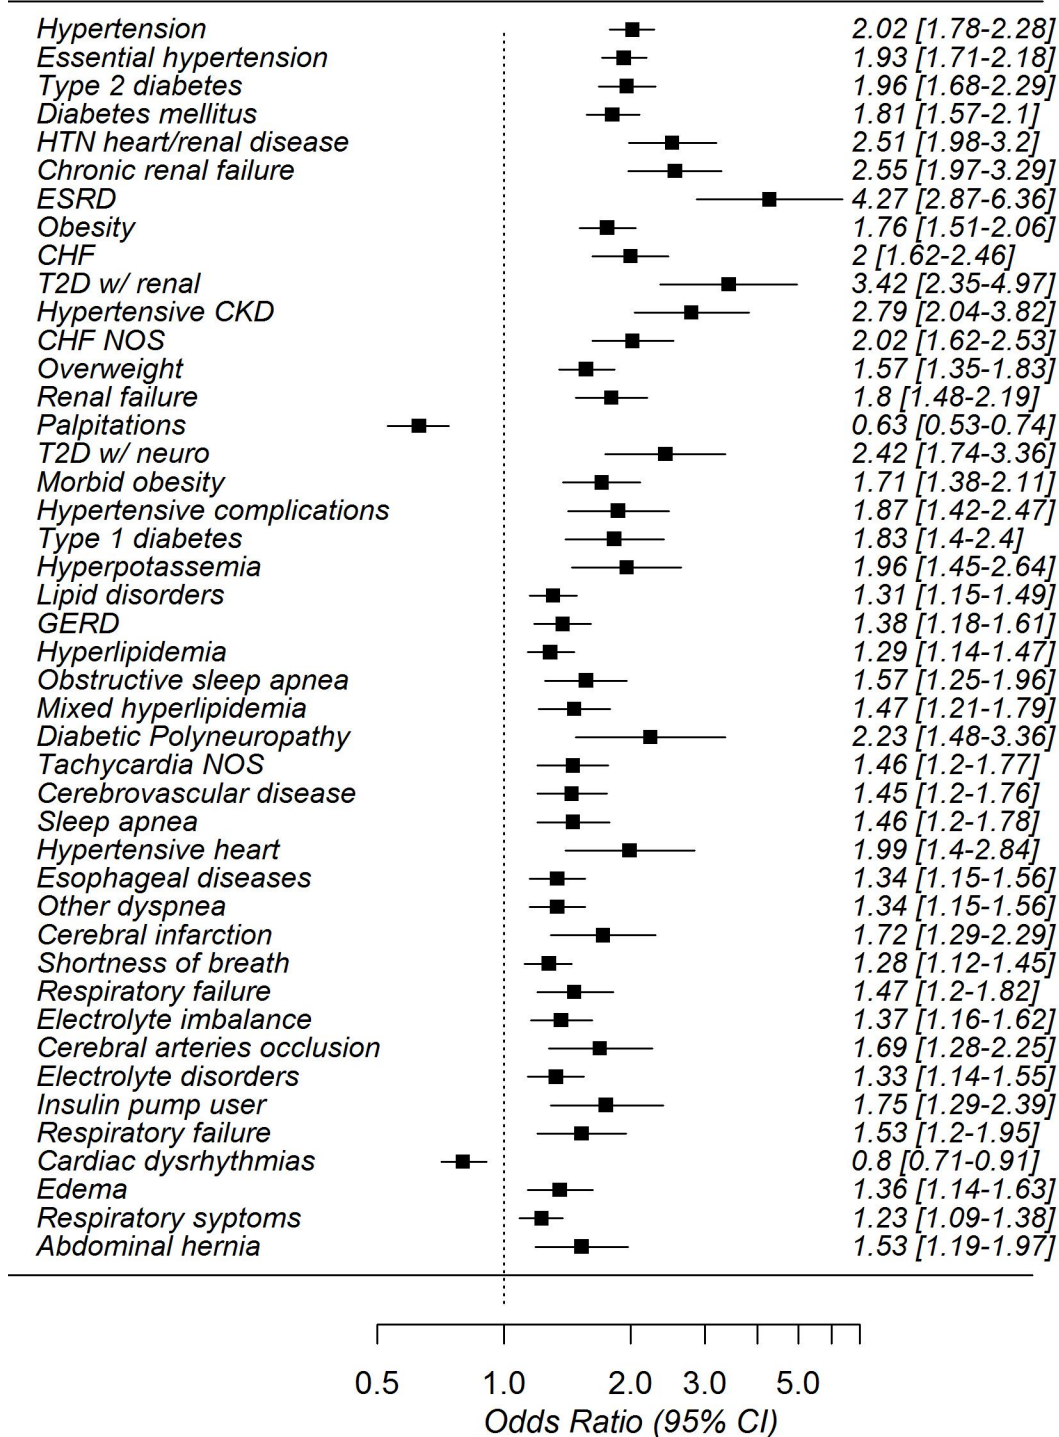

**Supplementary Figure 2: Clinical diagnoses present before the TTE associated with DD stage 1 versus normal diastolic function.** Association testing used a logistic regression analysis adjusting for age, gender, self-reported race and setting. Shown are all diagnoses with FDR  $q < 0.01$ .

# Supplementary figure 3

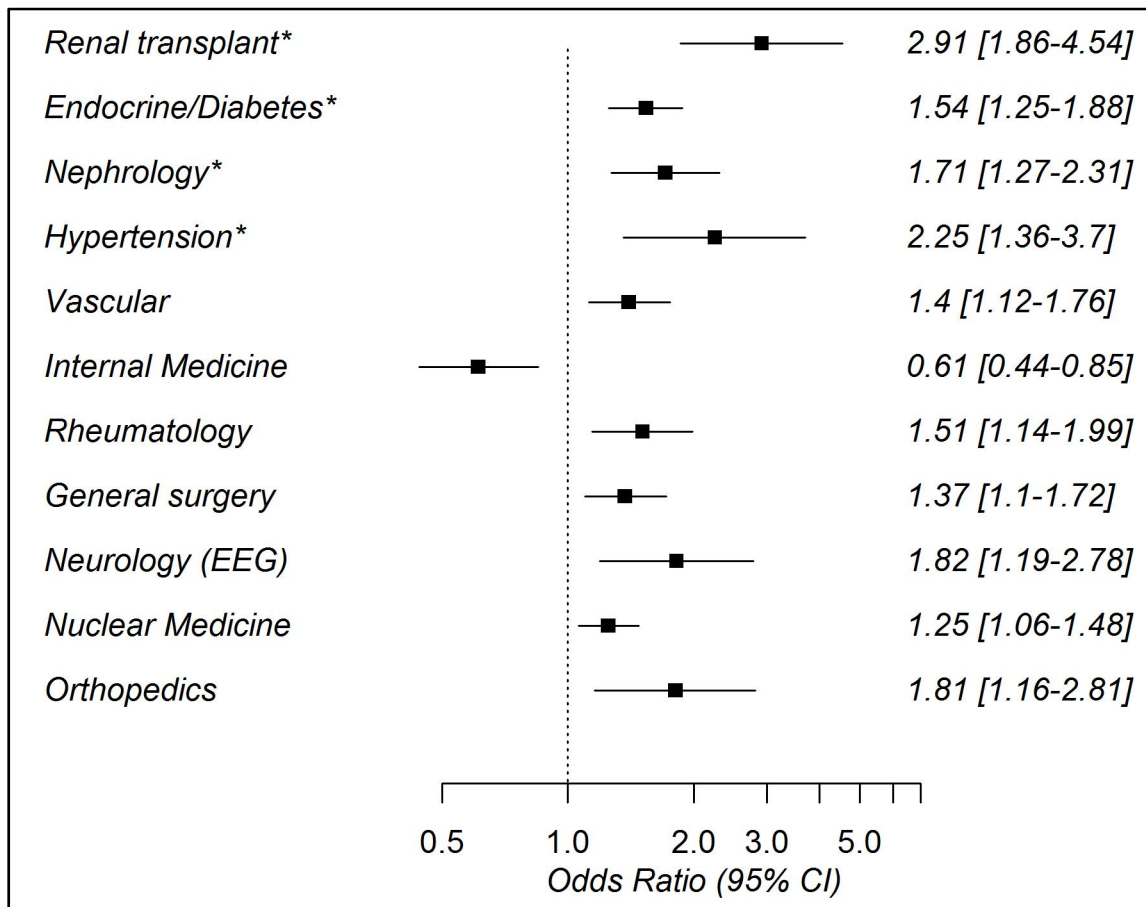

**Supplementary Figure 3: Outpatient clinics associated with individuals with stage 1 diastolic dysfunction.** Clinics where each subject was evaluated prior to the echocardiogram were identified. Odds-ratios show the association between stage 1 DD versus normal diastolic function for a clinic. Multivariable logistic regression analyses were adjusted for age, gender, self-reported race and setting. Shown are all associations with FDR  $q < 0.1$ . An asterisk indicates FDR  $q < 0.05$ .

Supplementary table 1. Strings used to identify diastolic function stages within echocardiogram reports.

| Diastolic function stage | Search string                                                  | Comments                                                                                                                                      |
|--------------------------|----------------------------------------------------------------|-----------------------------------------------------------------------------------------------------------------------------------------------|
| Normal                   | normal diastolic filling pattern                               |                                                                                                                                               |
| Normal                   | normal diastolic function                                      | Exclude if part of any of the strings: "low normal diastolic function", "abnormal diastolic function" or "probably normal diastolic function" |
| Normal                   | normal lv diastolic filling pattern                            | Exclude if part of the string: "abnormal lv diastolic filling"                                                                                |
| Normal                   | normal diastolic filling indices                               |                                                                                                                                               |
| Normal                   | normal lv diastolic filling indices                            |                                                                                                                                               |
| Stage 1                  | impaired relaxation (stage 1 diastolic dysfunction)            |                                                                                                                                               |
| Stage 1                  | abnormal lv relaxation (grade 1)                               | Exclude if part of the strings: "borderline abnormal lv relaxation (grade 1)" or "mildly abnormal lv relaxation (grade 1)"                    |
| Stage 2                  | pseudonormal diastolic filling (stage 2 diastolic dysfunction) |                                                                                                                                               |
| Stage 2                  | pseudonormal lv relaxation (grade 2)                           |                                                                                                                                               |
| Stage 2                  | pseudonormal lv relaxation                                     |                                                                                                                                               |
| Stage 3                  | restrictive diastolic filling (stage 3 diastolic dysfunction)  |                                                                                                                                               |
| Stage 3                  | restrictive lv filling pattern                                 |                                                                                                                                               |
| Stage 3                  | restrictive lv filling                                         |                                                                                                                                               |
| Stage 3                  | restrictive lv filling (grade 3)                               |                                                                                                                                               |

**Supplementary table 2. ICD-9 diagnosis codes used for excluding subjects.** The number of subjects with a diagnosis is shown. Some subjects may have multiple diagnoses.

| ICD-9 code | ICD-9 descriptions                      | Number of subjects |
|------------|-----------------------------------------|--------------------|
| 423.9      | PERICARDIAL DISEASE NOS                 | 473                |
| 745.5      | SECUNDUM ATRIAL SEPT DEF                | 321                |
| 746.9      | CONG HEART ANOMALY NOS                  | 200                |
| 746.4      | CONG AORTA VALV INSUFFIC                | 177                |
| 424.9      | ENDOCARDITIS NOS                        | 167                |
| 423.8      | PERICARDIAL DISEASE NEC                 | 131                |
| 421        | AC/SUBAC BACT ENDOCARD                  | 124                |
| 37.34      | OTH HEART LES EXCISION                  | 122                |
| 35.22      | REPLACE AORTIC VALVE NEC                | 119                |
| 425.1      | HYPERTR OBSTR CARDIOMYOP                | 119                |
| 420.9      | ACUTE PERICARDITIS NOS                  | 117                |
| 424.3      | PULMONARY VALVE DISORDER                | 110                |
| V42.1      | HEART TRANSPLANT STATUS                 | 103                |
| V42.6      | LUNG TRANSPLANT STATUS                  | 98                 |
| 996.83     | COMPL HEART TRANSPLANT                  | 89                 |
| 425.11     | Hypertrophic obstructive cardiomyopathy | 82                 |
| 746.89     | CONG HEART ANOMALY NEC                  | 74                 |
| 425.18     | Other hypertrophic cardiomyopathy       | 64                 |
| 996.84     | COMPL LUNG TRANSPLANT                   | 64                 |
| 421.9      | AC/SUBAC ENDOCARDIT NOS                 | 52                 |
| 745.8      | SEPTAL CLOSURE ANOM NEC                 | 50                 |
| 394        | MITRAL STENOSIS                         | 48                 |
| 745.4      | VENTRICULAR SEPT DEFECT                 | 45                 |
| 746.3      | CONG AORTA VALV STENOSIS                | 44                 |
| 423.3      | CARDIAC TAMPONADE                       | 44                 |
| 35.12      | OPN MITRAL VALVULOPLASTY                | 41                 |
| 33.52      | BILAT LUNG TRANSPLANT                   | 38                 |
| 35.21      | REPLACE AORT VALV-TISSUE                | 33                 |
| 37.33      | OP HEART LES EXCISN NEC                 | 33                 |
| 35.71      | ATRIA SEPTA DEF REP NEC                 | 31                 |
| 35.24      | REPLACE MITRAL VALVE NEC                | 31                 |
| 420.99     | ACUTE PERICARDITIS NEC                  | 31                 |
| 423.2      | CONSTRUCTIV PERICARDITIS                | 31                 |
| 747.3      | PULMONARY ARTERY ANOM                   | 28                 |
| 747.1      | COARCTATION OF AORTA                    | 26                 |
| 429        | MYOCARDITIS NOS                         | 25                 |
| 746.02     | CONG PULMON VALVE STENOS                | 25                 |
| 420.91     | AC IDIOPATH PERICARDITIS                | 23                 |
| 394.2      | MITRAL STENOSIS W INSUFF                | 23                 |
| 429.83     | TAKOTSUBO SYNDROME                      | 23                 |
| 37.12      | PERICARDIOTOMY                          | 22                 |
| 35.52      | PROS REPAIR ATRIA DEF-CL                | 21                 |

|        |                          |    |
|--------|--------------------------|----|
| 746.6  | CONG MITRAL INSUFFICIENC | 20 |
| 395    | RHEUMAT AORTIC STENOSIS  | 20 |
| 747.22 | AORTIC ATRESIA/STENOSIS  | 18 |
| 747.21 | ANOMALIES OF AORTIC ARCH | 18 |
| 420    | AC PERICARDIT IN OTH DIS | 18 |
| 212.7  | BENIGN NEOPLASM HEART    | 17 |
| 421.1  | AC ENDOCARDIT IN OTH DIS | 17 |
| 745.9  | SEPTAL CLOSURE ANOM NOS  | 17 |
| 37.51  | HEART TRANSPLANTATION    | 15 |
| 747.49 | GREAT VEIN ANOMALY NEC   | 15 |
| 35     | HEART VALVES & SEPTA OPS | 13 |
| 745.2  | TETRALOGY OF FALLOT      | 13 |
| 747.42 | PART ANOM PULM VEN CONN  | 13 |
| 391.1  | ACUTE RHEUMATIC ENDOCARD | 12 |
| 746.81 | CONG SUBAORTIC STENOSIS  | 11 |
| 746.2  | EBSTEIN'S ANOMALY        | 11 |
| 37.5   | HEART TRANSPLANTATION    | 11 |
| 747    | PATENT DUCTUS ARTERIOSUS | 11 |
| 35.61  | GRAFT REPAIR ATRIAL DEF  | 10 |
| 745.61 | OSTIUM PRIMUM DEFECT     | 10 |
| 35.23  | REPLACE MITR VALV-TISSUE | 9  |
| 746.09 | PULMONARY VALVE ANOM NEC | 9  |
| 420    | ACUTE PERICARDITIS       | 9  |
| 35.96  | PERCUTAN VALVULOPLASTY   | 9  |
| 397.9  | RHEUM ENDOCARDITIS NOS   | 8  |
| 35.11  | OPN AORTIC VALVULOPLASTY | 8  |
| 424.91 | ENDOCARDITIS IN OTH DIS  | 8  |
| 747.29 | CONG ANOM OF AORTA NEC   | 7  |
| 422.91 | IDIOPATHIC MYOCARDITIS   | 7  |
| 745.69 | ENDOCARD CUSHION DEF NEC | 7  |
| 674.54 | CARDIOMYOPATH POSTPARTUM | 7  |
| 424.9  | ENDOCARDITIS NOS         | 7  |
| 35.25  | REPLACE PULM VALV-TISSUE | 7  |
| 747    | OTH CONG CIRC SYST ANOM  | 6  |
| 422.9  | ACUTE MYOCARDITIS NOS    | 6  |
| 746.1  | CONG TRICUSP ATRES/STEN  | 6  |
| 745.6  | ENDOCARD CUSHION DEF NOS | 6  |
| 424.99 | ENDOCARDITIS NEC         | 6  |
| 35.26  | REPLACE PULMON VALVE NEC | 6  |
| 746.01 | CONG PULMON VALV ATRESIA | 5  |
| 390    | RHEUM FEV W/O HRT INVOLV | 5  |
| 35.28  | REPLACE TRICUSP VALV NEC | 5  |
| 425.3  | ENDOCARD FIBROELASTOSIS  | 5  |
| 35.91  | INTERAT VEN RETRN TRANSP | 4  |
| 746.87 | MALPOSITION OF HEART     | 4  |
| 746.5  | CONGEN MITRAL STENOSIS   | 4  |
| 33.51  | UNILAT LUNG TRANSPLANT   | 4  |
| 745.11 | DOUBLE OUTLET RT VENTRIC | 4  |
| 35.32  | CHORDAE TENDINEAE OPS    | 4  |
| 423.1  | ADHESIVE PERICARDITIS    | 4  |

|        |                                                   |   |
|--------|---------------------------------------------------|---|
| 747.4  | GREAT VEIN ANOMALY NOS                            | 4 |
| 747.39 | Other anomalies of pulmonary artery and pulmonary | 4 |
| 747.2  | CONG ANOM OF AORTA NOS                            | 3 |
| 747.1  | COARCTATION OF AORTA                              | 3 |
| 746    | PULMONARY VALVE ANOM NOS                          | 3 |
| 745.3  | COMMON VENTRICLE                                  | 3 |
| 745.12 | CORRECT TRANSPOS GRT VES                          | 3 |
| 745.1  | COMPL TRANSPOS GREAT VES                          | 3 |
| 745    | COMMON TRUNCUS                                    | 3 |
| 35.27  | REPLACE TRIC VALV-TISSUE                          | 3 |
| V43.2  | HEART REPLACEMENT NEC                             | 3 |
| 35.94  | CONDUIT ATRIUM-PULM ART                           | 3 |
| 747.31 | Pulmonary artery coarctation and atresia          | 2 |
| 35.92  | CONDUIT RT VENT-PUL ART                           | 2 |
| 422    | ACUTE MYOCARDITIS                                 | 2 |
| 747.32 | Pulmonary arteriovenous malformation              | 2 |
| 35.72  | VENTR SEPTA DEF REP NEC                           | 2 |
| 746.82 | COR TRIARIATUM                                    | 2 |
| 746.8  | CONG HEART ANOMALY NEC                            | 2 |
| 35.7   | HEART SEPTA REPAIR NOS                            | 2 |
| 746    | OTHER CONGEN HEART ANOM                           | 2 |
| 745.6  | ENDOCARD CUSHION DEFECTS                          | 2 |
| 35.42  | CREATE SEPTAL DEFECT                              | 2 |
| 425.2  | OBSC AFRIC CARDIOMYOPATH                          | 2 |
| 115.94 | HISTOPLASMOSIS ENDOCARD                           | 2 |
| 112.81 | CANDIDAL ENDOCARDITIS                             | 2 |
| 747.41 | TOT ANOM PULM VEN CONNEC                          | 2 |
| 422.99 | ACUTE MYOCARDITIS NEC                             | 1 |
| 35.82  | TOTAL REPAIR OF TAPVC                             | 1 |
| 422    | AC MYOCARDIT IN OTH DIS                           | 1 |
| 33.6   | HEART-LUNG TRANSPLANT                             | 1 |
| 746.86 | CONGENITAL HEART BLOCK                            | 1 |
| 746.84 | OBSTRUCT HEART ANOM NEC                           | 1 |
| 746.83 | INFUNDIB PULMON STENOSIS                          | 1 |
| 421    | AC/SUBAC ENDOCARDITIS                             | 1 |
| 746    | PULMONARY VALVE ANOMALY                           | 1 |
| 35.51  | PROS REP ATRIAL DEF-OPN                           | 1 |
| 391.2  | AC RHEUMATIC MYOCARDITIS                          | 1 |
| 35.34  | INFUNDIBULECTOMY                                  | 1 |
| 391    | ACUTE RHEUMATIC PERICARD                          | 1 |
| 674.5  | PERIPARTUM CM, UNSPEC                             | 1 |
| 35.06  | Transapical replacement of aortic valve           | 1 |
| 33.49  | LUNG REPAIR NEC                                   | 1 |
| 35.98  | OTHER HEART SEPTA OPS                             | 1 |
| 35.95  | HEART REPAIR REVISION                             | 1 |

**Supplementary table 3. Percentage of measurements available prior to the TTE for each continuous variable.** Shown are the counts and percentages of individuals with a risk factor measured any time before the TTE (top) and within 14 or 30 days prior to the TTE (as described in the Methods).

| <b>Characteristic</b>                                      | <b>Grade 0<br/>n (%)</b> | <b>Grade 1<br/>n (%)</b> |
|------------------------------------------------------------|--------------------------|--------------------------|
| <b>All available measurements prior to TTE</b>             |                          |                          |
| Blood pressures                                            | 4283 (93.4)              | 1601 (95.5)              |
| Heart rate                                                 | 4087 (89.1)              | 1521 (90.8)              |
| BMI                                                        | 3758 (81.9)              | 1391 (83.0)              |
| Creatine level                                             | 3345 (72.9)              | 1337 (79.8)              |
| Serum glucose                                              | 3418 (74.5)              | 1349 (80.5)              |
| <b>Measures near time of TTE (as described in methods)</b> |                          |                          |
| Blood pressures                                            | 3534 (77.0)              | 1347 (80.4)              |
| Heart rate                                                 | 3202 (69.8)              | 1213 (72.4)              |
| BMI                                                        | 3225 (70.3)              | 1200 (71.6)              |
| Creatine level                                             | 2328 (50.8)              | 1015 (60.6)              |
| Serum glucose                                              | 2453 (53.5)              | 1055 (62.9)              |



**Supplementary table 4. Prevalence of grade 1 DD by year of TTE and age groups.**  
The values in the cells are the percentage of individuals with grade 1 DD.

|                  | <b>Number of stage<br/>1 DD cases</b> | <b>40-45 years</b> | <b>45-50 years</b> | <b>50-55<br/>years</b> |
|------------------|---------------------------------------|--------------------|--------------------|------------------------|
| <b>1997-2004</b> | 85                                    | 7                  | 13.4               | 28.1                   |
| <b>2005-2009</b> | 754                                   | 16.7               | 22.9               | 40.8                   |
| <b>2010-2015</b> | 888                                   | 14.6               | 23.8               | 37.5                   |

**Supplementary table 5. Clinical diagnosis present before the TTE associated with DD stage 1 versus normal diastolic function.** Association testing used a logistic regression analysis adjusting for age, gender, self-reported race and setting. Shown are all diagnoses with FDR  $q < 0.01$ .

| PheWAS code | Diagnosis                                              | Cases | Controls | Odds-ratio | 95% CI      | p-value | FDR q-value |
|-------------|--------------------------------------------------------|-------|----------|------------|-------------|---------|-------------|
| 401         | Hypertension                                           | 2795  | 3142     | 2.02       | (1.78-2.28) | 5.3E-29 | 2.2E-26     |
| 401.1       | Essential hypertension                                 | 2732  | 3205     | 1.93       | (1.71-2.18) | 6.3E-26 | 1.3E-23     |
| 250.2       | Type 2 diabetes                                        | 882   | 5055     | 1.96       | (1.68-2.29) | 2.1E-17 | 2.8E-15     |
| 250         | Diabetes mellitus                                      | 1096  | 4841     | 1.81       | (1.57-2.10) | 8.2E-16 | 8.3E-14     |
| 401.2       | Hypertensive heart and/or renal disease                | 309   | 5628     | 2.51       | (1.98-3.20) | 6.2E-14 | 5.0E-12     |
| 585.3       | Chronic renal failure [CKD]                            | 272   | 5665     | 2.55       | (1.97-3.29) | 8.2E-13 | 4.8E-11     |
| 585.32      | End stage renal disease                                | 114   | 5823     | 4.27       | (2.87-6.36) | 8.2E-13 | 4.8E-11     |
| 278.1       | Obesity                                                | 879   | 5058     | 1.76       | (1.51-2.06) | 1.7E-12 | 8.4E-11     |
| 428         | Congestive heart failure; nonhypertensive              | 420   | 5517     | 2.00       | (1.62-2.46) | 1.1E-10 | 5.2E-09     |
| 250.22      | Type 2 diabetes with renal manifestations              | 125   | 5812     | 3.42       | (2.35-4.97) | 1.3E-10 | 5.2E-09     |
| 401.22      | Hypertensive chronic kidney disease                    | 178   | 5759     | 2.79       | (2.04-3.82) | 1.5E-10 | 5.6E-09     |
| 428.1       | Congestive heart failure (CHF) NOS                     | 361   | 5576     | 2.02       | (1.62-2.53) | 7.7E-10 | 2.6E-08     |
| 278         | Overweight, obesity and other hyperalimentation        | 1050  | 4887     | 1.57       | (1.35-1.83) | 2.6E-09 | 8.2E-08     |
| 585         | Renal failure                                          | 537   | 5400     | 1.80       | (1.48-2.19) | 3.0E-09 | 8.8E-08     |
| 427.9       | Palpitations                                           | 1254  | 4683     | 0.63       | (0.53-0.74) | 2.9E-08 | 7.8E-07     |
| 250.24      | Type 2 diabetes with neurological manifestations       | 159   | 5778     | 2.42       | (1.74-3.36) | 1.3E-07 | 3.3E-06     |
| 278.11      | Morbid obesity                                         | 428   | 5509     | 1.71       | (1.38-2.11) | 9.1E-07 | 2.2E-05     |
| 401.3       | Other hypertensive complications                       | 231   | 5706     | 1.87       | (1.42-2.47) | 9.7E-06 | 2.2E-04     |
| 250.1       | Type 1 diabetes                                        | 246   | 5691     | 1.83       | (1.40-2.40) | 1.1E-05 | 2.3E-04     |
| 276.13      | Hyperpotassemia                                        | 197   | 5740     | 1.96       | (1.45-2.64) | 1.1E-05 | 2.3E-04     |
| 272         | Disorders of lipid metabolism                          | 1822  | 4115     | 1.31       | (1.15-1.49) | 2.9E-05 | 5.6E-04     |
| 530.11      | GERD                                                   | 965   | 4972     | 1.38       | (1.18-1.61) | 4.1E-05 | 7.6E-04     |
| 272.1       | Hyperlipidemia                                         | 1816  | 4121     | 1.29       | (1.14-1.47) | 6.3E-05 | 0.001       |
| 327.32      | Obstructive sleep apnea                                | 379   | 5558     | 1.57       | (1.25-1.96) | 8.0E-05 | 0.001       |
| 272.13      | Mixed hyperlipidemia                                   | 517   | 5420     | 1.47       | (1.21-1.79) | 1.1E-04 | 0.002       |
| 250.6       | Polyneuropathy in diabetes                             | 101   | 5836     | 2.23       | (1.48-3.36) | 1.2E-04 | 0.002       |
| 427.7       | Tachycardia NOS                                        | 564   | 5373     | 1.46       | (1.20-1.77) | 1.2E-04 | 0.002       |
| 433         | Cerebrovascular disease                                | 566   | 5371     | 1.45       | (1.20-1.76) | 1.2E-04 | 0.002       |
| 327.3       | Sleep apnea                                            | 531   | 5406     | 1.46       | (1.20-1.78) | 1.3E-04 | 0.002       |
| 401.21      | Hypertensive heart disease                             | 136   | 5801     | 1.99       | (1.40-2.84) | 1.4E-04 | 0.002       |
| 530.1       | Esophagitis, GERD and related diseases                 | 1013  | 4924     | 1.34       | (1.15-1.56) | 1.5E-04 | 0.002       |
| 512.9       | Other dyspnea                                          | 1011  | 4926     | 1.34       | (1.15-1.56) | 1.6E-04 | 0.002       |
| 433.21      | Cerebral artery occlusion, with cerebral infarction    | 216   | 5721     | 1.72       | (1.29-2.29) | 2.4E-04 | 0.003       |
| 512.7       | Shortness of breath                                    | 1622  | 4315     | 1.28       | (1.12-1.45) | 2.5E-04 | 0.003       |
| 509         | Respiratory failure, insufficiency, arrest             | 489   | 5448     | 1.47       | (1.20-1.82) | 2.6E-04 | 0.003       |
| 276.1       | Electrolyte imbalance                                  | 819   | 5118     | 1.37       | (1.16-1.62) | 2.7E-04 | 0.003       |
| 433.2       | Occlusion of cerebral arteries                         | 225   | 5712     | 1.69       | (1.28-2.25) | 2.7E-04 | 0.003       |
| 276         | Disorders of fluid, electrolyte, and acid-base balance | 1100  | 4837     | 1.33       | (1.14-1.55) | 3.4E-04 | 0.004       |
| 250.3       | Insulin pump user                                      | 187   | 5750     | 1.75       | (1.29-2.39) | 3.4E-04 | 0.004       |
| 509.1       | Respiratory failure                                    | 339   | 5598     | 1.53       | (1.20-1.95) | 5.2E-04 | 0.005       |
| 427         | Cardiac dysrhythmias                                   | 2096  | 3841     | 0.80       | (0.71-0.91) | 5.9E-04 | 0.006       |
| 782.3       | Edema                                                  | 677   | 5260     | 1.36       | (1.14-1.63) | 6.1E-04 | 0.006       |
| 512         | Other symptoms of respiratory system                   | 2597  | 3340     | 1.23       | (1.09-1.38) | 8.1E-04 | 0.008       |
| 550         | Abdominal hernia                                       | 293   | 5644     | 1.53       | (1.19-1.97) | 9.3E-04 | 0.009       |

**Supplementary table 6. Clinical diagnosis associated with DD stage 1 versus normal diastolic function.** This reduced subset comprises those diagnoses selected using a multivariable selection model incorporating diagnoses associated with DD at FDR  $q < 0.01$ .

| Diagnosis                                              | Odds-ratio | 95% CI        | p-value |
|--------------------------------------------------------|------------|---------------|---------|
| Hypertension                                           | 1.66       | (1.45 - 1.89) | 6.7E-14 |
| Cardiac dysrhythmias                                   | 0.62       | (0.53 - 0.72) | 1.1E-09 |
| End stage renal disease                                | 3.29       | (2.19 - 4.96) | 1.2E-08 |
| Tachycardia NOS                                        | 1.74       | (1.38 - 2.19) | 2.9E-06 |
| Congestive heart failure;<br>nonhypertensive           | 1.54       | (1.24 - 1.93) | 1.2E-04 |
| Type 2 diabetes                                        | 1.37       | (1.16 - 1.62) | 2.2E-04 |
| Obesity                                                | 1.28       | (1.08 - 1.52) | 4.1E-03 |
| Cerebral artery occlusion, with<br>cerebral infarction | 1.5        | (1.12 - 2.02) | 6.9E-03 |
| GERD                                                   | 1.18       | (1 - 1.38)    | 0.048   |

**Supplementary table 7. Risk factor levels, by DD status, using all available data prior to the TTE for each risk factor.**

Values are mean (standard deviation) except for creatinine and glucose which are median (interquartile range). P-values are from a linear regression model adjusting for age, gender, self-reported race and setting. Log-transformed values were analyzed for creatinine and glucose.

| <b>Characteristic</b>                   | <b>Stage 0</b>    | <b>Stage 1</b>     | <b>p-value</b> |
|-----------------------------------------|-------------------|--------------------|----------------|
| Systolic blood pressure (mmHg)          | 123 (17)          | 130 (19)           | <.0001         |
| Diastolic blood pressure (mmHg)         | 75 (11)           | 79 (12)            | <.0001         |
| Heart rate (bpm)                        | 78 (16)           | 85 (16)            | <.0001         |
| BMI (kg/m <sup>2</sup> )                | 30.3 (7.8)        | 33.3 (8.5)         | <.0001         |
| Creatinine level (mg/dl) (median [IQR]) | 0.85 (0.7 - 1.00) | 0.90 (0.75 - 1.13) | <.0001         |
| Serum glucose (mg/dl) (median [IQR])    | 96 (87 - 111)     | 103 (92 - 130)     | <.0001         |

**Supplementary table 8. Incident clinical diagnosis associated with DD stage 1 versus normal diastolic function.** Subjects assigned a diagnosis prior to the echocardiogram were excluded from the analysis of that diagnosis. Association testing used a logistic regression analysis adjusting for age, gender, self-reported race and setting. Shown are all diagnoses with a FDR  $q < 0.01$ .

| PheWAS code | Diagnosis                                                          | Cases | Controls | Odds-ratio | 95% CI      | p-value | FDR q-value |
|-------------|--------------------------------------------------------------------|-------|----------|------------|-------------|---------|-------------|
| 428         | Congestive heart failure; nonhypertensive                          | 424   | 5278     | 2.85       | (2.32-3.51) | 6.8E-23 | 3.1E-20     |
| 428.4       | Heart failure with preserved EF [Diastolic heart failure]          | 199   | 5859     | 4.63       | (3.39-6.32) | 6.3E-22 | 1.4E-19     |
| 401.1       | Essential hypertension                                             | 1054  | 2344     | 2.17       | (1.83-2.57) | 4.9E-19 | 7.4E-17     |
| 401         | Hypertension                                                       | 1044  | 2285     | 2.09       | (1.76-2.48) | 6.0E-17 | 6.8E-15     |
| 428.1       | Congestive heart failure (CHF) NOS                                 | 345   | 5418     | 2.57       | (2.04-3.23) | 6.3E-16 | 5.7E-14     |
| 401.2       | Hypertensive heart and/or renal disease                            | 355   | 5435     | 2.24       | (1.79-2.80) | 2.1E-12 | 1.4E-10     |
| 416         | Cardiomegaly                                                       | 532   | 5335     | 1.96       | (1.62-2.36) | 2.1E-12 | 1.4E-10     |
| 278.1       | Obesity                                                            | 556   | 4686     | 1.89       | (1.56-2.29) | 4.5E-11 | 2.6E-09     |
| 401.21      | Hypertensive heart disease                                         | 201   | 5801     | 2.40       | (1.79-3.22) | 4.8E-09 | 2.3E-07     |
| 428.2       | Heart failure NOS                                                  | 128   | 5951     | 3.02       | (2.08-4.37) | 5.1E-09 | 2.3E-07     |
| 411.4       | Coronary atherosclerosis                                           | 511   | 4822     | 1.78       | (1.46-2.16) | 5.8E-09 | 2.4E-07     |
| 278         | Overweight, obesity and other hyperalimentation                    | 647   | 4420     | 1.70       | (1.42-2.03) | 1.0E-08 | 3.8E-07     |
| 411         | Ischemic Heart Disease                                             | 665   | 4388     | 1.64       | (1.38-1.96) | 3.6E-08 | 1.2E-06     |
| 250.2       | Type 2 diabetes                                                    | 474   | 4741     | 1.76       | (1.44-2.15) | 4.3E-08 | 1.4E-06     |
| 250         | Diabetes mellitus                                                  | 765   | 4228     | 1.56       | (1.32-1.84) | 2.2E-07 | 6.7E-06     |
| 425         | Cardiomyopathy                                                     | 154   | 5857     | 2.41       | (1.73-3.37) | 2.4E-07 | 6.8E-06     |
| 250.24      | Type 2 diabetes with neurological manifestations                   | 227   | 5758     | 2.00       | (1.52-2.64) | 8.4E-07 | 2.2E-05     |
| 327.3       | Sleep apnea                                                        | 558   | 5037     | 1.58       | (1.31-1.91) | 2.3E-06 | 5.8E-05     |
| 401.22      | Hypertensive chronic kidney disease                                | 210   | 5732     | 1.99       | (1.49-2.65) | 2.8E-06 | 6.8E-05     |
| 411.8       | Other chronic ischemic heart disease, unspecified                  | 226   | 5785     | 1.93       | (1.46-2.54) | 3.7E-06 | 8.2E-05     |
| 272.1       | Hyperlipidemia                                                     | 1066  | 3250     | 1.44       | (1.24-1.69) | 3.8E-06 | 8.2E-05     |
| 414         | Other forms of chronic heart disease                               | 313   | 5640     | 1.76       | (1.38-2.23) | 4.2E-06 | 8.6E-05     |
| 292         | Neurological disorders                                             | 444   | 5309     | 1.61       | (1.31-1.98) | 5.7E-06 | 1.1E-04     |
| 327.32      | Obstructive sleep apnea                                            | 554   | 5207     | 1.55       | (1.28-1.87) | 6.0E-06 | 1.1E-04     |
| 272         | Disorders of lipid metabolism                                      | 1064  | 3246     | 1.43       | (1.22-1.67) | 7.3E-06 | 1.3E-04     |
| 276         | Disorders of fluid, electrolyte, and acid-base balance             | 773   | 4222     | 1.46       | (1.24-1.73) | 8.4E-06 | 1.4E-04     |
| 580         | Nephritis; nephrosis; renal sclerosis                              | 116   | 5892     | 2.40       | (1.63-3.53) | 8.5E-06 | 1.4E-04     |
| 276.14      | Hypopotassemia                                                     | 426   | 5193     | 1.60       | (1.30-1.98) | 1.0E-05 | 1.7E-04     |
| 250.6       | Polyneuropathy in diabetes                                         | 183   | 5860     | 1.99       | (1.46-2.70) | 1.1E-05 | 1.7E-04     |
| 428.3       | Heart failure with reduced EF [Systolic or combined heart failure] | 116   | 5972     | 2.35       | (1.60-3.45) | 1.2E-05 | 1.8E-04     |
| 272.13      | Mixed hyperlipidemia                                               | 691   | 4913     | 1.46       | (1.23-1.73) | 2.0E-05 | 2.9E-04     |
| 327         | Sleep disorders                                                    | 843   | 4563     | 1.42       | (1.20-1.66) | 2.5E-05 | 3.5E-04     |
| 278.11      | Morbid obesity                                                     | 350   | 5355     | 1.63       | (1.29-2.06) | 3.5E-05 | 4.8E-04     |
| 585         | Renal failure                                                      | 455   | 5106     | 1.53       | (1.25-1.88) | 3.9E-05 | 5.1E-04     |
| 627         | Menopausal and postmenopausal disorders                            | 418   | 5365     | 0.57       | (0.44-0.75) | 4.1E-05 | 5.3E-04     |
| 401.3       | Other hypertensive complications                                   | 178   | 5712     | 1.91       | (1.40-2.62) | 4.7E-05 | 6.0E-04     |
| 250.22      | Type 2 diabetes with renal manifestations                          | 123   | 5893     | 2.15       | (1.48-3.12) | 5.4E-05 | 6.5E-04     |
| 395.2       | Nonrheumatic aortic valve disorders                                | 173   | 5846     | 1.90       | (1.38-2.60) | 7.0E-05 | 8.3E-04     |
| 512.7       | Shortness of breath                                                | 1092  | 3474     | 1.36       | (1.17-1.58) | 7.2E-05 | 8.4E-04     |
| 425.1       | Primary/intrinsic cardiomyopathies                                 | 127   | 5914     | 2.10       | (1.45-3.03) | 7.7E-05 | 8.5E-04     |
| 356         | Hereditary and idiopathic peripheral neuropathy                    | 205   | 5769     | 1.81       | (1.35-2.42) | 7.7E-05 | 8.5E-04     |
| 411.2       | Myocardial infarction                                              | 260   | 5473     | 1.69       | (1.30-2.19) | 9.4E-05 | 0.001       |
| 585.3       | Chronic renal failure [CKD]                                        | 273   | 5571     | 1.65       | (1.28-2.13) | 1.2E-04 | 0.001       |
| 585.1       | Acute renal failure                                                | 382   | 5366     | 1.51       | (1.21-1.88) | 2.3E-04 | 0.002       |
| 276.6       | Fluid overload                                                     | 276   | 5694     | 1.61       | (1.25-2.08) | 2.4E-04 | 0.002       |
| 415.21      | Primary pulmonary hypertension                                     | 116   | 5974     | 2.06       | (1.40-3.03) | 2.5E-04 | 0.002       |
| 573.2       | Liver replaced by transplant                                       | 136   | 5990     | 0.45       | (0.29-0.70) | 3.4E-04 | 0.003       |
| 288.2       | Elevated white blood cell count                                    | 315   | 5597     | 1.55       | (1.22-1.97) | 3.6E-04 | 0.003       |
| 433.8       | Late effects of cerebrovascular disease                            | 158   | 5888     | 1.81       | (1.30-2.52) | 4.0E-04 | 0.004       |
| 250.3       | Insulin pump user                                                  | 243   | 5707     | 1.62       | (1.24-2.13) | 4.4E-04 | 0.004       |
| 458         | Hypotension                                                        | 476   | 5281     | 1.43       | (1.17-1.75) | 5.1E-04 | 0.005       |
| 452         | Other venous embolism and thrombosis                               | 220   | 5661     | 1.65       | (1.24-2.19) | 5.5E-04 | 0.005       |
| 300.4       | Dysthymic disorder                                                 | 163   | 5821     | 1.79       | (1.29-2.50) | 5.7E-04 | 0.005       |
| 743.11      | Osteoporosis NOS                                                   | 201   | 5818     | 0.55       | (0.39-0.78) | 8.6E-04 | 0.007       |
| 276.1       | Electrolyte imbalance                                              | 632   | 4657     | 1.36       | (1.13-1.62) | 9.3E-04 | 0.008       |
| 292.1       | Aphasia/speech disturbance                                         | 106   | 5907     | 1.97       | (1.32-2.94) | 9.3E-04 | 0.008       |
| 512         | Other symptoms of respiratory system                               | 1349  | 2226     | 1.29       | (1.11-1.51) | 9.6E-04 | 0.008       |
| 250.1       | Type 1 diabetes                                                    | 155   | 5729     | 1.75       | (1.26-2.44) | 9.7E-04 | 0.008       |
| 338.2       | Chronic pain                                                       | 303   | 5708     | 1.51       | (1.18-1.94) | 1.0E-03 | 0.008       |
| 586         | Other disorders of the kidney and ureters                          | 363   | 5444     | 1.45       | (1.16-1.82) | 1.2E-03 | 0.009       |

**Supplementary table 9. Characteristics of subjects with second a echocardiogram.**  
 Characteristics are grouped by the diastolic function staging at the first and second echo.

| <b>Characteristic</b>                         | <b>No change<br/>(stage 0 for<br/>both)</b> | <b>Progression<br/>(Normal to stage<br/>1)</b> | <b>No change<br/>(stage 1 for<br/>both)</b> | <b>Regression<br/>(Stage 1 to<br/>stage 0)</b> |
|-----------------------------------------------|---------------------------------------------|------------------------------------------------|---------------------------------------------|------------------------------------------------|
| <b>n</b>                                      | 291                                         | 101                                            | 119                                         | 61                                             |
| <b>Gender</b>                                 |                                             |                                                |                                             |                                                |
| Male                                          | 129 (44.3%)                                 | 51 (50.5%)                                     | 54 (45.4%)                                  | 27 (44.3%)                                     |
| Female                                        | 162 (55.7%)                                 | 50 (49.5%)                                     | 65 (54.6%)                                  | 34 (55.7%)                                     |
| <b>Age</b>                                    |                                             |                                                |                                             |                                                |
| mean (s.d.)                                   |                                             |                                                |                                             |                                                |
| 40-45                                         | 90 (30.9%)                                  | 22 (21.8%)                                     | 19 (16.0%)                                  | 16 (26.2%)                                     |
| 45-50                                         | 109 (37.5%)                                 | 30 (29.7%)                                     | 38 (31.9%)                                  | 22 (36.1%)                                     |
| 50-55                                         | 92 (31.6%)                                  | 49 (48.5%)                                     | 62 (52.1%)                                  | 23 (37.7%)                                     |
| <b>Race</b>                                   |                                             |                                                |                                             |                                                |
| W                                             | 238 (81.8%)                                 | 79 (78.2%)                                     | 98 (82.4%)                                  | 50 (82%)                                       |
| B                                             | 44 (15.1%)                                  | 21 (20.8%)                                     | 17 (14.3%)                                  | 11 (18.0%)                                     |
| U                                             | 9 (3.1%)                                    | 1 (1.0%)                                       | 4 (3.4%)                                    | 0 (0%)                                         |
| <b>Years between<br/>echoes [Mean (s.d.)]</b> |                                             |                                                |                                             |                                                |
|                                               | 2.1 (1.7)                                   | 3.4 (2.6)                                      | 2.5 (2.0)                                   | 1.9 (1.8)                                      |
| <b>Years between<br/>echoes Median (IQR)]</b> |                                             |                                                |                                             |                                                |
|                                               | 1.6 (1.0 - 2.9)                             | 3.0 (1.2 - 4.9)                                | 1.8 (1.0 - 3.7)                             | 1.5 (0.8 - 2.6)                                |

**Supplementary table 10. Association of continuous variables with progression and regression of DD stage between the first and second echocardiogram.** The average change is the beta coefficient from a multivariable regression model where the difference in the continuous variable between the second and first echocardiogram was the dependent variable and either progressor (Yes vs. no) or regressor (Yes vs. no) was the independent variable. All models were adjusted for age, gender, self-reported race and time duration between echocardiograms.

Creatine and glucose levels were log-transformed.

| Characteristic                                                                                       | Number subjects with measurements | Average change | 95% CI         | p-value       |
|------------------------------------------------------------------------------------------------------|-----------------------------------|----------------|----------------|---------------|
| <b>Comparison of progressors (stage 0 to stage 1) versus no change from normal (stage 0 in both)</b> |                                   |                |                |               |
| Systolic blood pressure (mmHg)                                                                       | 328                               | 4.2            | (0.4 - 8.0)    | <b>0.03</b>   |
| Diastolic blood pressure (mmHg)                                                                      | 328                               | 2.4            | (-0.3 - 5.2)   | 0.08          |
| Heart rate (bpm)                                                                                     | 298                               | 8.3            | (4.2 - 12.4)   | <b>0.0001</b> |
| BMI (kg/m <sup>2</sup> )                                                                             | 315                               | 1.4            | (-0.7 - 3.4)   | 0.19          |
| Creatinine level (mg/dl) (median [IQR])                                                              | 202                               | 0.04           | (0.00 - 0.09)  | 0.06          |
| Serum glucose (mg/dl) (median [IQR])                                                                 | 218                               | 0.04           | (-0.02 - 0.10) | 0.21          |
| <b>Comparison of regressors (stage 1 to stage 0) versus no change from stage 1 (stage 1 in both)</b> |                                   |                |                |               |
| Systolic blood pressure (mmHg)                                                                       | 157                               | -8.4           | (-14.7 - -2.0) | <b>0.01</b>   |
| Diastolic blood pressure (mmHg)                                                                      | 157                               | -6.5           | (-10.5 - -2.5) | <b>0.002</b>  |
| Heart rate (bpm)                                                                                     | 145                               | -0.1           | (-5.8 - 5.6)   | 0.97          |
| BMI (kg/m <sup>2</sup> )                                                                             | 145                               | -2.0           | (-4.8 - 0.8)   | 0.15          |
| Creatinine level (mg/dl) (median [IQR])                                                              | 98                                | -0.05          | (-0.12 - 0.02) | 0.19          |
| Serum glucose (mg/dl) (median [IQR])                                                                 | 106                               | -0.05          | (-0.16 - 0.05) | 0.33          |

**Supplementary table 11. Repeat of association analyses for continuous variables with progression and regression of DD stage between the first and second echocardiogram, restricting the analyses to individuals with >1.5 years between TTEs.**

Creatine and glucose levels were log-transformed.

| Characteristic                                                                                       | Number subjects with measurements | Average change | 95% CI         | p-value       |
|------------------------------------------------------------------------------------------------------|-----------------------------------|----------------|----------------|---------------|
| <b>Comparison of progressors (stage 0 to stage 1) versus no change from normal (stage 0 in both)</b> |                                   |                |                |               |
| Systolic blood pressure (mmHg)                                                                       | 179                               | 2.8            | (-2.4 - 7.9)   | 0.30          |
| Diastolic blood pressure (mmHg)                                                                      | 179                               | 1.8            | (-1.9 - 5.5)   | 0.34          |
| Heart rate (bpm)                                                                                     | 171                               | 6.0            | (0.6 - 11.3)   | <b>0.03</b>   |
| BMI (kg/m <sup>2</sup> )                                                                             | 177                               | 0.6            | (-2.0 - 3.3)   | 0.63          |
| Creatinine level (mg/dl) (median [IQR])                                                              | 105                               | 0.02           | (-0.05 - 0.08) | 0.67          |
| Serum glucose (mg/dl) (median [IQR])                                                                 | 117                               | -0.02          | (-0.08 - 0.05) | 0.62          |
| <b>Comparison of regressors (stage 1 to stage 0) versus no change from stage 1 (stage 1 in both)</b> |                                   |                |                |               |
| Systolic blood pressure (mmHg)                                                                       | 84                                | -12.1          | (-20.8 - -3.5) | <b>0.0075</b> |
| Diastolic blood pressure (mmHg)                                                                      | 84                                | -11.0          | (-16.2 - -5.7) | <b>0.0001</b> |
| Heart rate (bpm)                                                                                     | 79                                | 1.0            | (-6.9 - 9.0)   | 0.80          |
| BMI (kg/m <sup>2</sup> )                                                                             | 80                                | -3.9           | (-7.9 - 0.0)   | 0.06          |
| Creatinine level (mg/dl) (median [IQR])                                                              | 59                                | -0.09          | (-0.19 - 0.02) | 0.13          |
| Serum glucose (mg/dl) (median [IQR])                                                                 | 51                                | 0.05           | (-0.07 - 0.16) | 0.43          |
